# Supplementary material for: Prediction of DNA and RNA structure with the NARES-2P force field and conformational space annealing
Source: Royal Society of Chemistry journal article supplement (doi:10.1039/c8cp03018a), 2018-01-01
Supplement: c8cp03018a1.pdf [file c8cp03018a1.pdf]

# Electronic Supplementary Information for Prediction of DNA and RNA Structure with the NARES-2P Force Field and Conformational Space Annealing

Adam K. Sieradzan,<sup>\*a,b</sup> Łukasz Golon,<sup>a</sup> and Adam Liwo<sup>a,b</sup>

<sup>a</sup> *Faculty of Chemistry, University of Gdańsk, 80-308 Gdańsk, Poland. Fax: +48 48 523-5012; Tel: +48 58 523 5142; E-mail: adams86@wp.pl*

<sup>b</sup> *School of Computational Sciences, Korea Institute for Advanced Study, 85 Hoegiro, Dongdaemun-gu, Seoul 130-722, Republic of Korea.*

## Constraints derived from the CyloFold server

In one of the simulations of PreQ1 Class II riboswitch from *Streptococcus pneumoniae* we used constraints based on the results of CyloFold server contact prediction. We used the CyloFold output directly with no further processing, thus if a particular contact was listed twice (e.g., 2 28 and 28 2), the constraint was twice as strong. The following pairs of nucleobases were subject to constraints:

2 28  
3 27  
4 26  
5 25  
6 24  
7 23  
8 22  
9 21  
15 57  
16 56  
17 55  
18 54  
19 53  
20 52  
22 8  
23 7  
24 6  
25 5  
26 4  
27 3  
28 2  
29 1  
39 49  
40 48  
41 47  
42 46  
47 41  
48 40  
49 39  
50 38  
53 19  
54 18  
55 17  
56 16  
57 15  
58 14
